# Supplementary material for: Depth-resolved oxidational studies of Be/Al periodic multilayers investigated by X-ray photoelectron spectroscopy
Source: Royal Society of Chemistry journal article supplement (doi:10.1039/d2cp04778k), 2022-12-02
Supplement: d2cp04778k1.pdf [file d2cp04778k1.pdf]

## Supplementary information

### Depth resolved oxidational studies of Be/Al periodic multilayers investigated by X-ray photoelectron spectroscopy

Niranjan Kumar<sup>1\*</sup>, Roman S Pleshkov<sup>1</sup>, B.S. Prathibha<sup>2</sup>, Vladimir N Polkovnikov<sup>1</sup>, Nikolay I Chkhalo<sup>1</sup>, Vladimir A. Golyashov<sup>3,4</sup>, Oleg E. Tereshchenko<sup>3,4</sup>

<sup>1</sup> Institute for Physics of Microstructures, RAS, Afonino, Nizhny Novgorod 603087, Russia.

<sup>2</sup> BNM Institute of Technology, Bangalore, Karnataka 560070, India.

<sup>3</sup> Institute of Semiconductor Physics, SB RAS, Novosibirsk 630090, Russia.

<sup>4</sup> Synchrotron Radiation Facility SKIF, Boreskov Institute of Catalysis, SB RAS, Kol'tsovo 630559, Russia

**Fig. 1-SI.** O 1s peak shift for as – deposited (0), and Ar<sup>+</sup> ion sputtered samples for 5, 15, 25, 35 and 45 minutes.

**Fig. 2-SI.** Plasmon shift in XPS spectra of Be<sub>7.86</sub>/Al<sub>0.62</sub> (sample 1):  $\hbar\omega_p\text{Be}$  and  $\hbar\omega_p\text{Al}$  – first order plasmon of Be and Al, respectively;  $2\hbar\omega_p\text{Be}$  and  $2\hbar\omega_p\text{Al}$  – second order plasmon of Be and Al, respectively;  $\hbar\omega_{ps}\text{Al}$  – surface plasmon of Al.

**Fig. 3-SI.** Plasmon shift in XPS spectra of Be<sub>4.44</sub>/Al<sub>4.10</sub> (sample 2):  $\hbar\omega_p\text{Be}$  and  $\hbar\omega_p\text{Al}$  – first order plasmon of Be and Al, respectively;  $2\hbar\omega_p\text{Be}$  and  $2\hbar\omega_p\text{Al}$  – second order plasmon of Be and Al, respectively;  $\hbar\omega_{ps}\text{Al}$  – surface plasmon of Al.

**Fig. 4-SI.** Plasmon shift in XPS spectra of Be<sub>1.62</sub>/Al<sub>6.90</sub> (sample 3):  $\hbar\omega_p\text{Be}$  and  $\hbar\omega_p\text{Al}$  – first order plasmon of Be and Al, respectively;  $2\hbar\omega_p\text{Be}$  and  $2\hbar\omega_p\text{Al}$  – second order plasmon of Be and Al, respectively;  $\hbar\omega_{ps}\text{Al}$  – surface plasmon of Al.

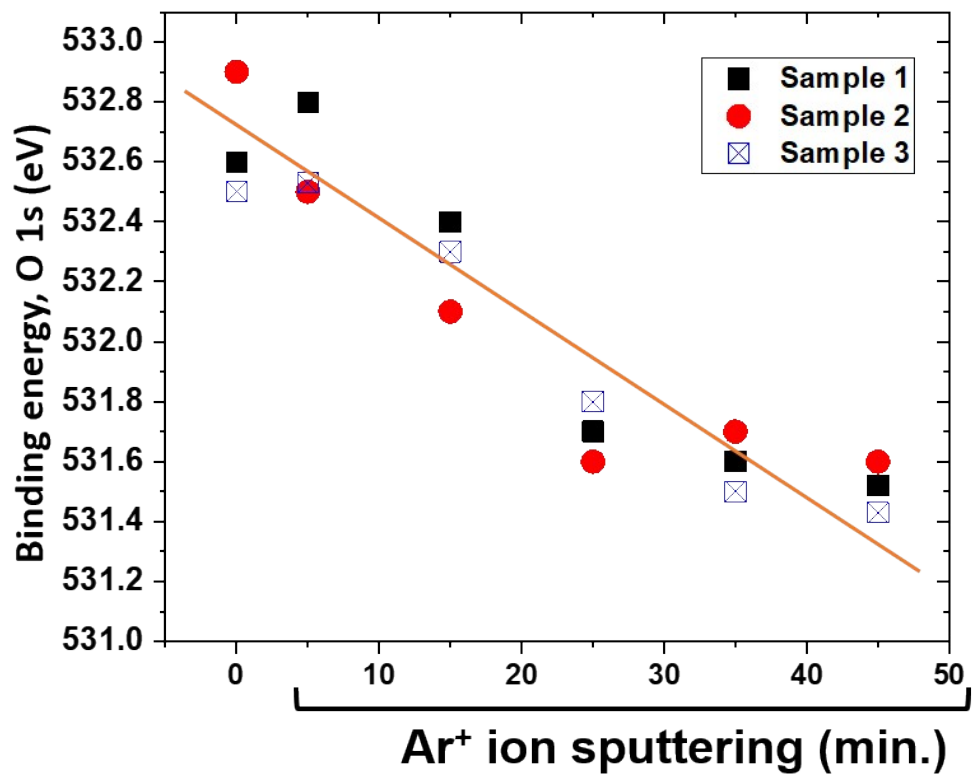

Fig. 1-SI. O 1s peak shift for as – deposited (0), and Ar<sup>+</sup> ion sputtered samples for 5, 15, 25, 35 and 45 minutes.

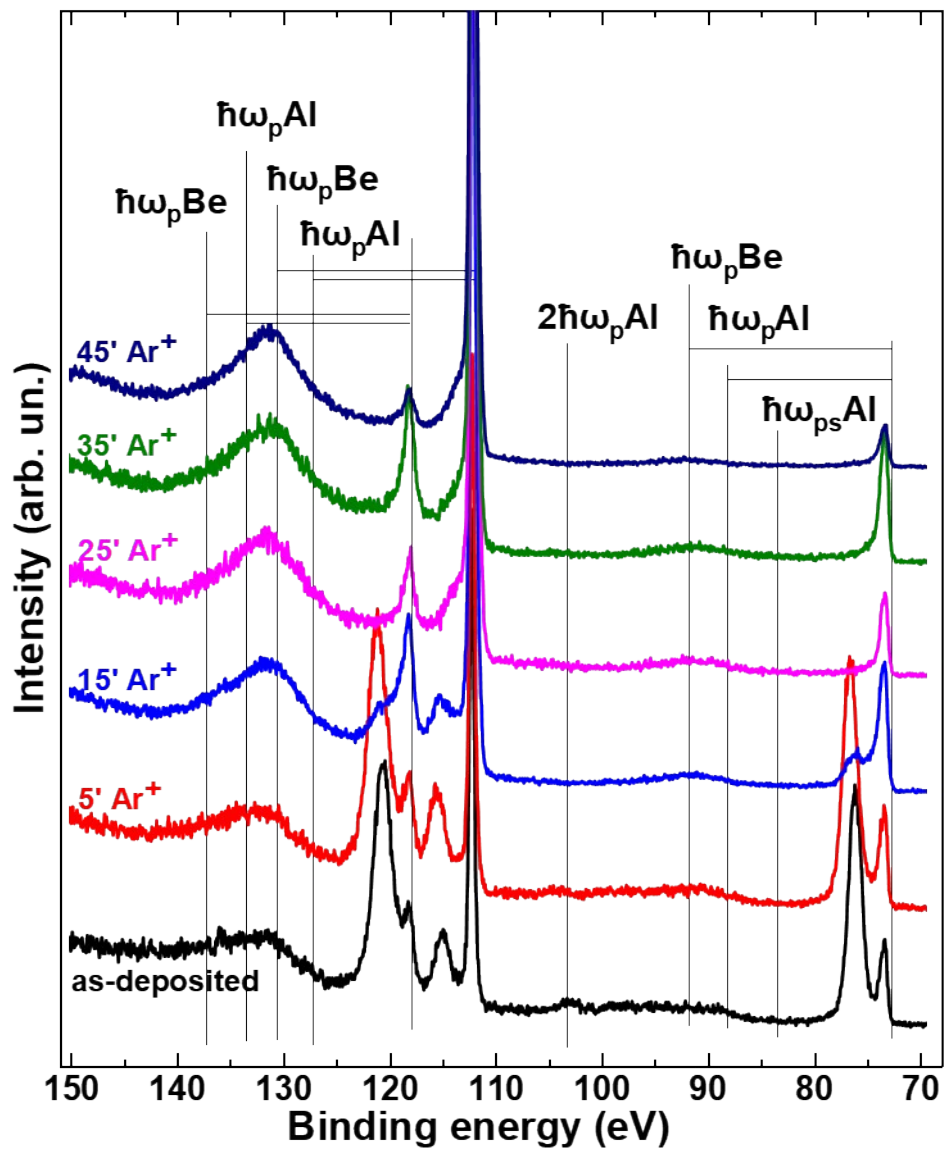

Fig. 2-SI. Plasmon shift in XPS spectra of  $\text{Be}_{7.86}/\text{Al}_{0.62}$  (sample 1):  $\hbar\omega_p\text{Be}$  and  $\hbar\omega_p\text{Al}$  – first order plasmon of Be and Al, respectively;  $2\hbar\omega_p\text{Be}$  and  $2\hbar\omega_p\text{Al}$  – second order plasmon of Be and Al, respectively;  $\hbar\omega_{ps}\text{Al}$  – surface plasmon of Al.

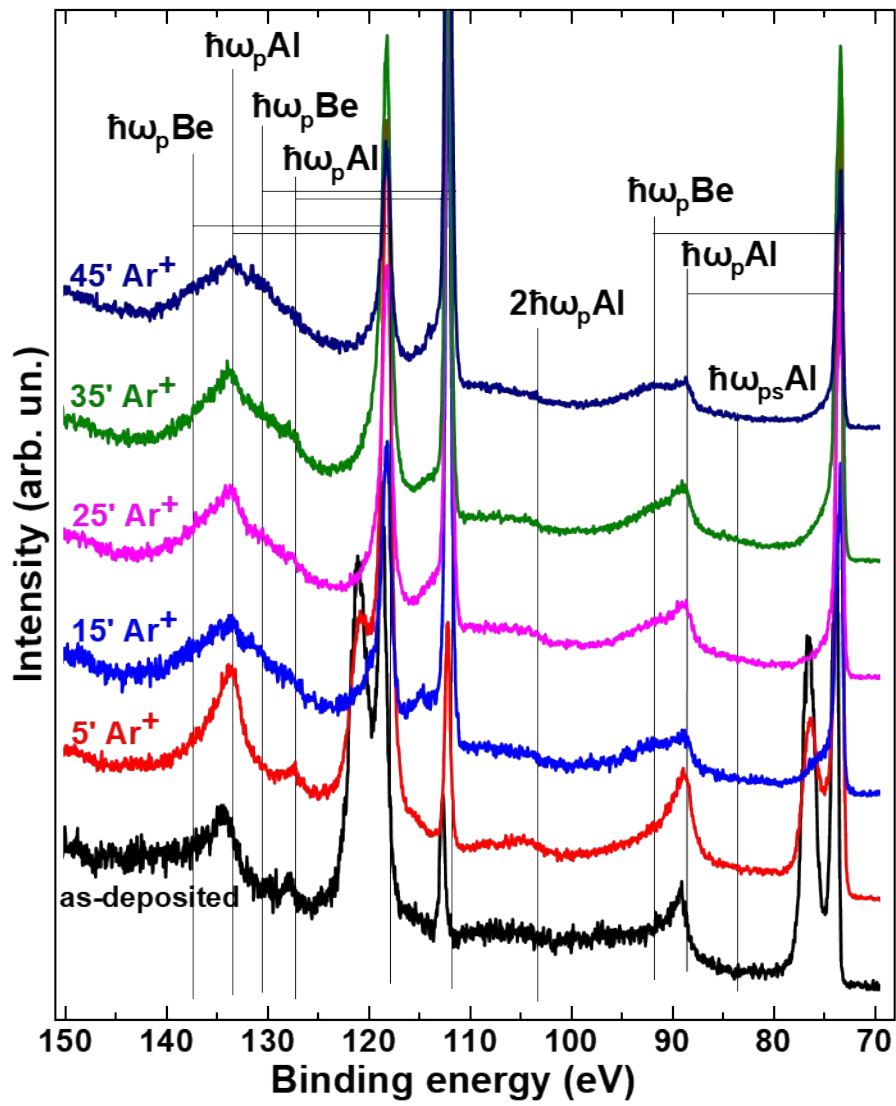

Fig. 3-SI. Plasmon shift in XPS spectra of  $\text{Be}_{4.44}/\text{Al}_{4.10}$  (sample 2):  $\hbar\omega_p\text{Be}$  and  $\hbar\omega_p\text{Al}$  – first order plasmon of Be and Al, respectively;  $2\hbar\omega_p\text{Be}$  and  $2\hbar\omega_p\text{Al}$  – second order plasmon of Be and Al, respectively;  $\hbar\omega_{ps}\text{Al}$  – surface plasmon of Al.

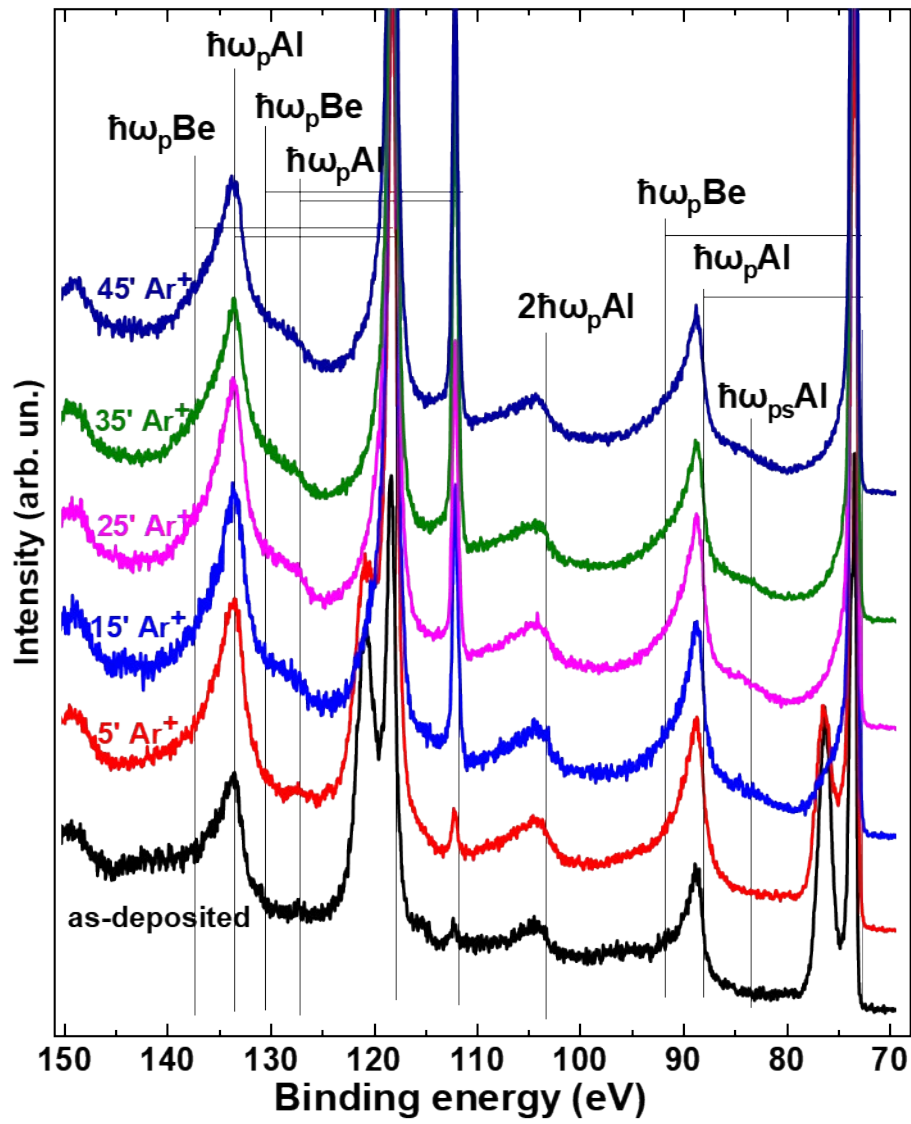

Fig. 4-SI. Plasmon shift in XPS spectra of  $\text{Be}_{1.62}/\text{Al}_{6.90}$  (sample 3):  $\hbar\omega_p\text{Be}$  and  $\hbar\omega_p\text{Al}$  – first order plasmon of Be and Al, respectively;  $2\hbar\omega_p\text{Be}$  and  $2\hbar\omega_p\text{Al}$  – second order plasmon of Be and Al, respectively;  $\hbar\omega_{ps}\text{Al}$  – surface plasmon of Al.
